# Supplementary material
Source: publisher site journal article supplement (https://www.spandidos-publications.com/8148/downloadSupplementary)
Supplement: Supplementary file 1 [file downloadSupplementary]

## Sheet: Sheet1
Table I. Design and baseline characteristics of the trials included in the present meta- analysis.
	Sample size		Mean age, years		No. of males		No. of patients with KPS ≥70								Molecular characteristics (%)				Tumor type
							Preoperative				Postoperative				IDH wild-type/mutant		MGMT methylation/unmethylated		Astprcytoma grade IV		Oligodendro-glioma grade III		mPFS ±SD (months)		OS ± SD (months)		Postoperative neurological deficit
First author/s, year	5-ALA	FGS	5-ALA	FGS	5-ALA	FGS	5-ALA	SD	FGS	SD	5-ALA	SD	FGS	SD	5-ALA	FGS	5-ALA	FGS	5-ALA	FGS	5-ALA	FGS	5-ALA	FGS	5-ALA	FGS	5-ALA	FGS	(Refs.)
Eljamel et al, 2008	13	14	59.6	60.1	9	9	12	NR	14	NR	11	9.2	14	8.9	NR	NR	NR	NR	NR	NR	NR	NR	8.6±4.5	4.8±1.4	52.8±26	24.2±11.5	3	4	-39
Hansen et al, 2019	158	51	67.7	67.4	97	27	145	NR	49	NR	140	0.22	49	0.76	142	50	58	25	149	50	5	0	8.7±1.6	9.2±4.2	14.8±1.7	19.7±6.7	18	2	-37
Baig Mirza et al, 2021	253	90	56.6	54.4	174	57	251	NR	84	NR	238	10.93	82	8.26	19	5	120	41	NR	NR	NR	NR	NR	NR	17.47±2.4	10.63±1.2	23	45	-40
Baig Mirza et al, 2022	39	30	46.7	41.7	17	12	40	NR	28	NR	38	0.27	30	1.09	33	21	28	14	14	11	25	19	NR	NR	26±0.3	21±1.0	3	1	-41
Zeppa et al, 2022	40	44	63.9	60.8	21	21	40	NR	43	NR	37	16.6	42	10.8	40	44	23	21	NR	NR	NR	NR	NR	NR	20±16	12.3±5.7	23	21	-38
Total (%)	503 (68.7)	229 (31.3)	-	-	318 (63.2)	126 (55)	488 (97)	-	218 (95.1)	-	464 (92.2)	-	217 (94.7)	-	234 (46.5)	120 (52.4)	229 (45.5)	101 (41.1)	163 (32.4)	61 (26.6)	30 (5.9)	19 (8.2)	-	-	-	-	70 (13.9)	73 (31.8)
FGS, fluorescence-guided surgery; 5-ALA, 5-aminolevulinic acid; IDH-1, isocitrate dehydrogenase; KPS, Karnofsky Performance Scale; SD, standard deviation; OS, overall survival; mPFS, median progression-free survival
